# Supplementary material
Source: HighWire-hosted journal article supplement (https://www.cmaj.ca/highwire/filestream/58774/field_highwire_adjunct_files/1/contra-allen-2-at.pdf)
Supplement: contra-allen-2-at.pdf [file contra-allen-2-at.pdf]

| <b>Appendix 2: Use of contraception among women aged 40–44 years<sup>1-3</sup></b> |                            |                              |                  |
|------------------------------------------------------------------------------------|----------------------------|------------------------------|------------------|
| Method of contraception                                                            | % of women                 |                              |                  |
|                                                                                    | United States<br>2006–2008 | United Kingdom*<br>2008–2009 | Canada*†<br>2006 |
| Female sterilization                                                               | 50.2                       | 18                           | 16.4             |
| Male sterilization                                                                 | 19.6                       | 28                           | 19.6             |
| Oral contraceptive                                                                 | 11.1                       | 10                           | 17.1             |
| IUD                                                                                | 4.2                        | 12                           | 4.6              |
| Condom                                                                             | 8.8                        | 21                           | 42.5             |
| DMPA                                                                               | 1.1                        | 2                            | 1                |
| Periodic abstinence                                                                | 0.6                        | 4                            | 9                |
| Withdrawal                                                                         | 3                          | 6                            | 8.1              |

Note: DMPA = depot medroxyprogesterone acetate, IUD = intrauterine device.  
 \*Respondents could choose more than 1 answer.  
 †Canadian data were for women over 40; no upper age limit was specified.

## References

1. Mosher WD, Jones J. Use of contraception in the United States: 1982–2008. *Vital Health Stat 23* 2010;Aug:1-44.
2. Lader D. *Contraception and sexual health, 2008–9*. London (UK): Office for National Statistics; 2009. Available: [www.ons.gov.uk/ons/rel/lifestyles/contraception-and-sexual-health/2008-09/index.html](http://www.ons.gov.uk/ons/rel/lifestyles/contraception-and-sexual-health/2008-09/index.html) (accessed 2012 June 26).
3. Black A, Yang Q, Wu Wen S, et al. Contraceptive use among Canadian women of reproductive age: results of a national survey. *J Obstet Gynaecol Can* 2009;31:627-40.
